# Supplementary material for: Gut microbiome changes in overweight male adults following bowel preparation
Source: PubMed Central journal article supplement (PMC6311932; doi:10.1186/s12864-018-5285-6), 2018-12-31
Supplement: 12864_2018_5285_MOESM4_ESM.pdf [file 12864_2018_5285_MOESM4_ESM.pdf]

**Table S3.** Descriptive statistics of richness and Shannon diversity index

|                    | SB        |          | D7        |           | D28      |           |
|--------------------|-----------|----------|-----------|-----------|----------|-----------|
|                    | Type 1    | Type 2   | Type 1    | Type 2    | Type 1   | Type 2    |
| Richness (Min–Max) | 46–93     | 53–70    | 43–74     | 44–80     | 53–73    | 45–81     |
| mean±SD            | 62 ± 18.8 | 62 ± 5.3 | 58 ± 10.3 | 61 ± 11.5 | 63 ± 7.0 | 56 ± 10.2 |
| median             | 52        | 62       | 57        | 57        | 64       | 51        |
| P-value            | 0.323     |          | 0.594     |           | *0.025   |           |

|                         | SB          |             | D7          |             | D28         |             |
|-------------------------|-------------|-------------|-------------|-------------|-------------|-------------|
|                         | Type 1      | Type 2      | Type 1      | Type 2      | Type 1      | Type 2      |
| Shannon diversity index | 1.45–2.42   | 1.52–2.11   | 1.33–2.72   | 1.57–2.38   | 1.33–2.20   | 1.51–2.33   |
| mean±SD                 | 1.91 ± 0.33 | 1.75 ± 0.17 | 1.83 ± 0.42 | 2.00 ± 0.25 | 1.87 ± 0.29 | 1.81 ± 0.29 |
| median                  | 1.76        | 1.70        | 1.80        | 2.00        | 1.91        | 1.68        |
| P-value                 | 0.412       |             | 0.152       |             | 0.37        |             |

|        | P-values for richness |            |            |
|--------|-----------------------|------------|------------|
|        | SB vs. D7             | D7 vs. D28 | SB vs. D28 |
| Type 1 | 1                     | 0.215      | 0.331      |
| Type 2 | 0.553                 | 0.357      | *0.032     |

|        | P-values for Shannon index |            |            |
|--------|----------------------------|------------|------------|
|        | SB vs. D7                  | D7 vs. D28 | SB vs. D28 |
| Type 1 | 0.863                      | 0.73       | 1          |
| Type 2 | *0.016                     | 0.088      | 0.847      |

\*Abbreviation: SD, standard deviation

\*P-values are calculated by the Wilcoxon rank-sum test
