# Supplementary material for: Gut microbiome changes in overweight male adults following bowel preparation
Source: PubMed Central journal article supplement (PMC6311932; doi:10.1186/s12864-018-5285-6), 2018-12-31
Supplement: 12864_2018_5285_MOESM9_ESM.pdf [file 12864_2018_5285_MOESM9_ESM.pdf]

**Table S10.** Means of 26 predictive functional modules between the Type 1 and Type 2 fecal samples

| NO | KEGG (Level 3)                                             | SB      |         |         |         | D7      |         |         |         | D28     |         |         |         |
|----|------------------------------------------------------------|---------|---------|---------|---------|---------|---------|---------|---------|---------|---------|---------|---------|
|    |                                                            | Type 1  | Type 2  | P-value | adj.P   | Type 1  | Type 2  | P-value | adj.P   | Type 1  | Type 2  | P-value | adj.P   |
| 1  | Mineral absorption                                         | 7.5824  | 9.5733  | 0.00001 | 0.00262 | 7.3507  | 8.8004  | 0.00005 | 0.01048 | 7.6467  | 8.9129  | 0.00080 | 0.17552 |
| 2  | Arachidonic acid metabolism                                | 9.6366  | 10.9148 | 0.00008 | 0.01834 | 9.2958  | 10.1869 | 0.01247 | 1.00000 | 9.6609  | 10.1617 | 0.15194 | 1.00000 |
| 3  | Carbohydrate digestion and absorption                      | 8.8169  | 9.9184  | 0.00080 | 0.17552 | 8.6162  | 9.1864  | 0.11194 | 1.00000 | 8.7352  | 9.1548  | 0.15194 | 1.00000 |
| 4  | Cellular antigens                                          | 10.4850 | 11.0857 | 0.00116 | 0.25411 | 10.2878 | 10.5010 | 0.37022 | 1.00000 | 10.4765 | 10.3843 | 0.60268 | 1.00000 |
| 5  | Lipopolysaccharide biosynthesis                            | 12.1966 | 12.7818 | 0.00164 | 0.36151 | 12.0069 | 12.1849 | 0.65563 | 1.00000 | 12.1769 | 12.0935 | 0.82376 | 1.00000 |
| 6  | Protein digestion and absorption                           | 9.7715  | 10.4634 | 0.00424 | 0.93260 | 9.6069  | 9.8311  | 0.33116 | 1.00000 | 9.7208  | 9.8446  | 0.45610 | 1.00000 |
| 7  | Zeatin biosynthesis                                        | 10.4020 | 10.8721 | 0.00969 | 1.00000 | 10.2420 | 10.3382 | 0.82376 | 1.00000 | 10.3430 | 10.2558 | 0.60268 | 1.00000 |
| 8  | Prenyltransferases                                         | 12.1615 | 12.5501 | 0.01590 | 1.00000 | 11.9812 | 12.0346 | 1.00000 | 1.00000 | 12.1031 | 11.9262 | 0.29472 | 1.00000 |
| 9  | Lipopolysaccharide biosynthesis proteins                   | 12.5620 | 13.0145 | 0.02004 | 1.00000 | 12.3367 | 12.4271 | 0.82376 | 1.00000 | 12.5466 | 12.3007 | 0.33116 | 1.00000 |
| 10 | Homologous recombination                                   | 13.1951 | 13.5237 | 0.02505 | 1.00000 | 13.0319 | 13.0411 | 0.94084 | 1.00000 | 13.1533 | 12.9035 | 0.13080 | 1.00000 |
| 11 | DNA replication                                            | 12.8505 | 13.1634 | 0.02505 | 1.00000 | 12.6800 | 12.6845 | 1.00000 | 1.00000 | 12.8034 | 12.5510 | 0.13080 | 1.00000 |
| 12 | Riboflavin metabolism                                      | 11.9212 | 12.3582 | 0.02505 | 1.00000 | 11.7366 | 11.8017 | 0.94084 | 1.00000 | 11.9074 | 11.6814 | 0.41190 | 1.00000 |
| 13 | Ribosome                                                   | 14.0880 | 14.4502 | 0.03103 | 1.00000 | 13.9222 | 13.9641 | 0.88198 | 1.00000 | 14.0350 | 13.8365 | 0.20137 | 1.00000 |
| 14 | Pyrimidine metabolism                                      | 13.8581 | 14.2137 | 0.03103 | 1.00000 | 13.6903 | 13.7208 | 1.00000 | 1.00000 | 13.8180 | 13.5869 | 0.15194 | 1.00000 |
| 15 | DNA replication proteins                                   | 13.4728 | 13.7960 | 0.03103 | 1.00000 | 13.3030 | 13.3134 | 0.82376 | 1.00000 | 13.4322 | 13.1762 | 0.11194 | 1.00000 |
| 16 | One carbon pool by folate                                  | 12.8298 | 13.2123 | 0.03103 | 1.00000 | 12.6609 | 12.7064 | 1.00000 | 1.00000 | 12.7775 | 12.5846 | 0.22986 | 1.00000 |
| 17 | Translation factors                                        | 12.6340 | 12.9798 | 0.03103 | 1.00000 | 12.4650 | 12.4909 | 1.00000 | 1.00000 | 12.5914 | 12.3576 | 0.17541 | 1.00000 |
| 18 | Peptidoglycan biosynthesis                                 | 13.0345 | 13.4020 | 0.03813 | 1.00000 | 12.8508 | 12.8937 | 1.00000 | 1.00000 | 12.9969 | 12.7704 | 0.20137 | 1.00000 |
| 19 | Mismatch repair                                            | 13.0472 | 13.3662 | 0.03813 | 1.00000 | 12.8852 | 12.8786 | 0.88198 | 1.00000 | 13.0073 | 12.7506 | 0.13080 | 1.00000 |
| 20 | Folate biosynthesis                                        | 12.4129 | 12.7539 | 0.03813 | 1.00000 | 12.2037 | 12.2141 | 0.94084 | 1.00000 | 12.3716 | 12.0893 | 0.15194 | 1.00000 |
| 21 | Epithelial cell signaling in Helicobacter pylori infection | 10.8626 | 11.2185 | 0.03813 | 1.00000 | 10.6902 | 10.7038 | 0.76643 | 1.00000 | 10.8227 | 10.5532 | 0.13080 | 1.00000 |
| 22 | Vibrio cholerae pathogenic cycle                           | 10.7168 | 11.1400 | 0.03813 | 1.00000 | 10.5187 | 10.5643 | 0.94084 | 1.00000 | 10.7641 | 10.4541 | 0.22986 | 1.00000 |
| 23 | DNA repair and recombination proteins                      | 14.2997 | 14.6166 | 0.04645 | 1.00000 | 14.1271 | 14.1304 | 0.82376 | 1.00000 | 14.2666 | 13.9882 | 0.11194 | 1.00000 |
| 24 | Chromosome                                                 | 13.7265 | 14.0649 | 0.04645 | 1.00000 | 13.5617 | 13.5610 | 0.76643 | 1.00000 | 13.7091 | 13.4242 | 0.09518 | 1.00000 |
| 25 | Terpenoid backbone biosynthesis                            | 12.7126 | 13.0537 | 0.04645 | 1.00000 | 12.5369 | 12.5596 | 1.00000 | 1.00000 | 12.6520 | 12.4303 | 0.17541 | 1.00000 |
| 26 | Secondary bile acid biosynthesis                           | 10.0014 | 9.5554  | 0.04645 | 1.00000 | 9.8936  | 9.2731  | 0.00164 | 0.36151 | 9.9726  | 9.0514  | 0.00080 | 0.17552 |

\* The means are calculated by the 10-based logtransform of predictive functional reads

\* The p-values are calculated by the Wilcoxon rank-sum test.

\*ad.p: adjusted p-value using Bonferroni correction
