# Supplementary material for: Gut microbiome changes in overweight male adults following bowel preparation
Source: PubMed Central journal article supplement (PMC6311932; doi:10.1186/s12864-018-5285-6), 2018-12-31
Supplement: 12864_2018_5285_MOESM12_ESM.pdf [file 12864_2018_5285_MOESM12_ESM.pdf]

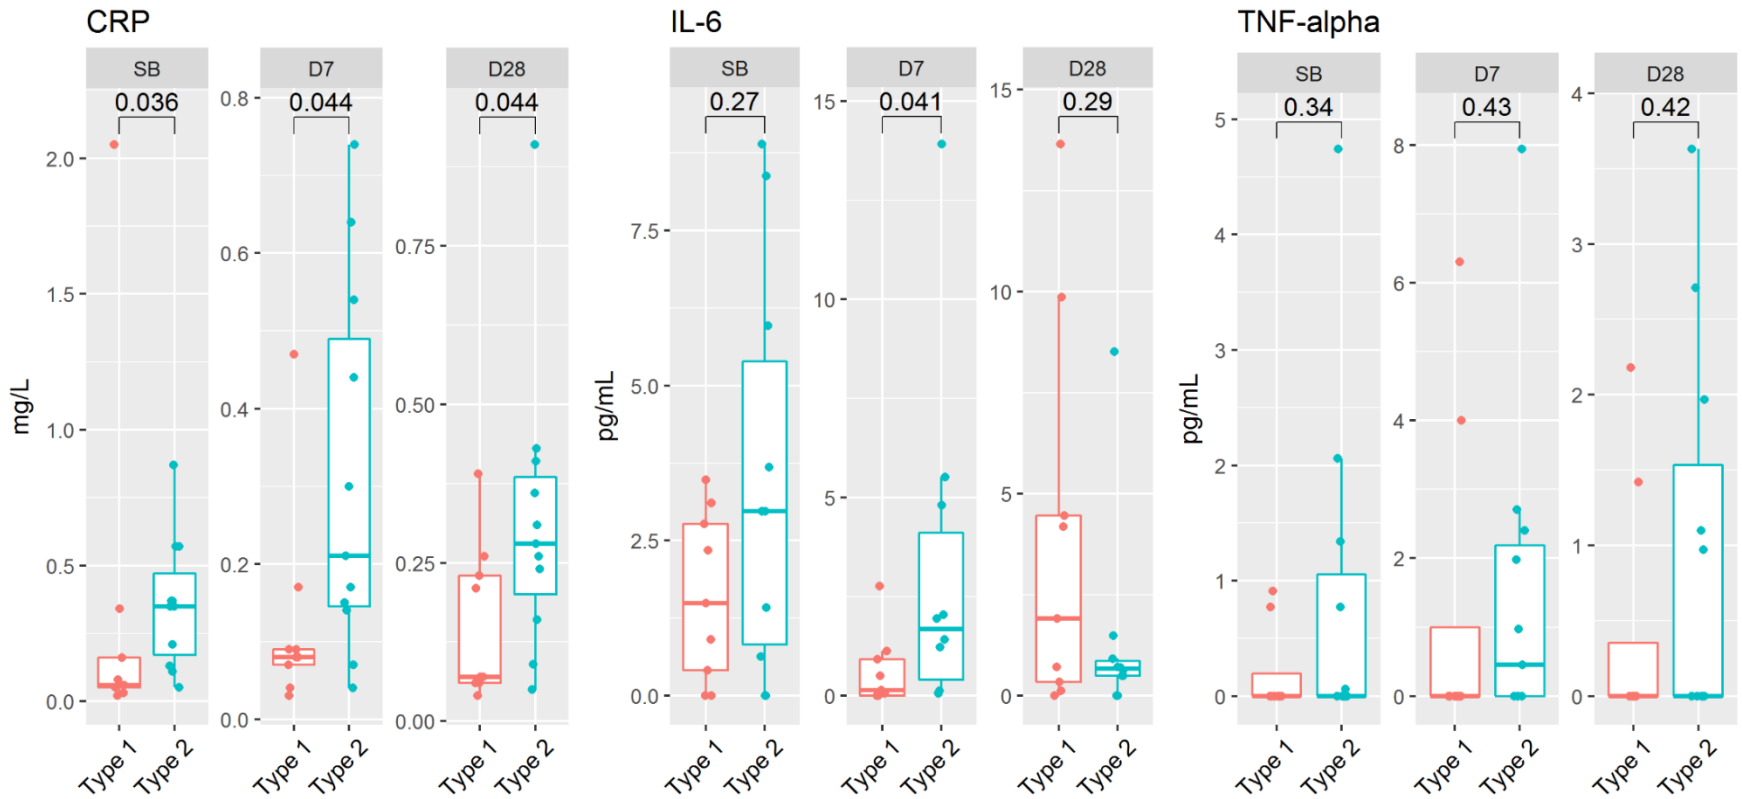

**Figure S7. Box plots of three inflammation cytokines.** At all three time points, the Type 2 group generally had higher median for CRP, IL-6, and TNF-alpha than the Type 1 group. For each type, by comparing individually CRP, IL-6 and TNF-alpha, there is no statistically significant over the three collection times.
