# Supplementary material for: Gut microbiome changes in overweight male adults following bowel preparation
Source: PubMed Central journal article supplement (PMC6311932; doi:10.1186/s12864-018-5285-6), 2018-12-31
Supplement: 12864_2018_5285_MOESM14_ESM.pdf [file 12864_2018_5285_MOESM14_ESM.pdf]

**Table S14. P-values between the Type 1 and Type 2 groups**

| NO | Blood                | Type 1 vs Type 2 |              |              |
|----|----------------------|------------------|--------------|--------------|
|    |                      | SB               | D7           | D28          |
| 1  | Hematocrit           | 0.879            | 0.543        | 0.342        |
| 2  | Hemoglobin           | 0.849            | 0.676        | 0.518        |
| 3  | RBC                  | 0.621            | 0.503        | 0.412        |
| 4  | WBC                  | 0.093            | 0.287        | 0.594        |
| 5  | Platelet             | 0.362            | 0.447        | 0.425        |
| 6  | Neutrophils          | 0.543            | 0.882        | 0.879        |
| 7  | Eosinophils          | 0.171            | <b>0.013</b> | 0.094        |
| 8  | Basophils            | 0.079            | <b>0.001</b> | <b>0.011</b> |
| 9  | Monocytes            | 0.362            | 0.342        | 0.939        |
| 10 | Lymphocytes          | 0.941            | 0.552        | 0.676        |
| 11 | Albumin              | 0.142            | 0.645        | 0.334        |
| 12 | Alkaline_phosphatase | 0.567            | 0.790        | 0.592        |
| 13 | SGPT                 | <b>0.033</b>     | <b>0.017</b> | <b>0.013</b> |
| 14 | SGOT                 | 0.169            | <b>0.011</b> | <b>0.049</b> |
| 15 | CRP                  | <b>0.036</b>     | <b>0.044</b> | <b>0.044</b> |
| 16 | Amylase              | 0.790            | 0.676        | 0.621        |
| 17 | Bilirubin            | 0.359            | 0.938        | 0.730        |
| 18 | Creatinine           | 0.401            | <b>0.033</b> | 0.424        |
| 19 | TP                   | 1.000            | 0.760        | 0.541        |
| 20 | FBG                  | 0.848            | 0.381        | 0.286        |
| 21 | Cholesterol          | 0.160            | 0.543        | 0.128        |
| 22 | HDL                  | 0.181            | 0.148        | 0.283        |
| 23 | LDL                  | 0.223            | 0.305        | 0.068        |
| 24 | Triglycerides        | 0.970            | 0.710        | 0.882        |

**Table S15. P-values between any two collection times for each type**

| NO | Blood                | Type 1   |           | Type 2   |              |
|----|----------------------|----------|-----------|----------|--------------|
|    |                      | SB vs D7 | SB vs D28 | SB vs D7 | SB vs D28    |
| 1  | Hematocrit           | 0.690    | 0.658     | 0.974    | 0.627        |
| 2  | Hemoglobin           | 0.894    | 0.723     | 0.818    | 0.824        |
| 3  | RBC                  | 0.965    | 0.895     | 0.949    | 0.863        |
| 4  | WBC                  | 0.929    | 0.594     | 0.509    | 0.626        |
| 5  | Platelet             | 0.929    | 0.791     | 0.797    | 0.930        |
| 6  | Neutrophils          | 0.965    | 0.931     | 0.341    | 1.000        |
| 7  | Eosinophils          | 0.566    | 0.627     | 0.742    | 0.426        |
| 8  | Basophils            | 0.824    | 0.687     | 0.664    | 0.929        |
| 9  | Monocytes            | 0.157    | 0.658     | 0.622    | 0.215        |
| 10 | Lymphocytes          | 1.000    | 1.000     | 0.478    | 1.000        |
| 11 | Albumin              | 0.784    | 0.129     | 0.593    | <b>0.042</b> |
| 12 | Alkaline_phosphatase | 0.757    | 0.965     | 0.921    | 1.000        |
| 13 | SGPT                 | 0.930    | 0.930     | 0.792    | 0.757        |
| 14 | SGOT                 | 0.592    | 0.929     | 0.446    | 0.756        |
| 15 | CRP                  | 0.626    | 0.894     | 0.669    | 0.477        |
| 16 | Amylase              | 0.965    | 0.859     | 0.818    | 0.930        |
| 17 | Bilirubin            | 0.894    | 0.657     | 0.508    | 0.473        |
| 18 | Creatinine           | 0.373    | 0.722     | 0.339    | 1.000        |
| 19 | TP                   | 0.824    | 0.535     | 0.816    | 0.425        |
| 20 | FBG                  | 0.352    | 0.859     | 0.197    | 0.250        |
| 21 | Cholesterol          | 0.863    | 0.724     | 0.921    | 0.791        |
| 22 | HDL                  | 0.894    | 0.690     | 0.869    | 0.626        |
| 23 | LDL                  | 0.860    | 0.724     | 0.599    | 0.930        |
| 24 | Triglycerides        | 0.895    | 1.000     | 0.922    | 0.965        |

\* The P-values are evaluated by the Wilcoxon rank sum test.
