# Supplementary material for: Gut microbiome changes in overweight male adults following bowel preparation
Source: PubMed Central journal article supplement (PMC6311932; doi:10.1186/s12864-018-5285-6), 2018-12-31
Supplement: 12864_2018_5285_MOESM16_ESM.pdf [file 12864_2018_5285_MOESM16_ESM.pdf]

**Table S17.** Participants' lifestyle

| ID  | Age | BMI<br>(kg/m <sup>2</sup> ) | Fecal Type | Occupation            | Smoking | Betel nut |
|-----|-----|-----------------------------|------------|-----------------------|---------|-----------|
| S07 | 53  | 26.6                        | Type 1     | Researcher            | No      | No        |
| S13 | 33  | 29.2                        | Type 1     | Engineer              | No      | No        |
| S16 | 37  | 34.2                        | Type 1     | Project manager       | No      | No        |
| S19 | 41  | 26.9                        | Type 1     | Manager               | No      | No        |
| S20 | 28  | 30.1                        | Type 1     | Researcher            | No      | No        |
| S29 | 52  | 25.9                        | Type 1     | Engineer              | No      | No        |
| S31 | 45  | 25.7                        | Type 1     | Researcher            | No      | No        |
| S32 | 40  | 31.6                        | Type 1     | Engineer              | NA      | No        |
| S33 | 40  | 26.7                        | Type 1     | Engineer              | NA      | No        |
| S04 | 48  | 29.7                        | Type 2     | Service industry      | No      | No        |
| S05 | 35  | 33.0                        | Type 2     | Taxi driver           | Yes     | Ever      |
| S06 | 39  | 30.1                        | Type 2     | Deliveryman           | Yes     | Yes       |
| S08 | 36  | 26.8                        | Type 2     | Engineer              | Yes     | No        |
| S10 | 49  | 26.8                        | Type 2     | Manager               | Yes     | No        |
| S11 | 31  | 33.3                        | Type 2     | NA                    | NA      | No        |
| S14 | 32  | 28.7                        | Type 2     | Motorcycle technician | Yes     | No        |
| S21 | 47  | 27.5                        | Type 2     | Elementary teacher    | Yes     | No        |
| S23 | 44  | 26.7                        | Type 2     | Salesman              | No      | No        |
| S34 | 41  | 27.6                        | Type 2     | Engineer              | NA      | No        |
| S36 | 38  | 31.3                        | Type 2     | Computer engineer     | NA      | No        |

\* BMI: Evaluated at prior to bowel preparation
