# Supplementary material for: Gut microbiome changes in overweight male adults following bowel preparation
Source: PubMed Central journal article supplement (PMC6311932; doi:10.1186/s12864-018-5285-6), 2018-12-31
Supplement: 12864_2018_5285_MOESM17_ESM.pdf [file 12864_2018_5285_MOESM17_ESM.pdf]

**Table S18.** Percentage of fecal samples and mean relative abundance of SMB53, Bulleidia, and Akkermansia

| <b>Type 1</b> |        |        |         |         |         |          |
|---------------|--------|--------|---------|---------|---------|----------|
| <b>Genus</b>  | SB(N%) | D7(N%) | D28(N%) | mean_SB | mean_D7 | mean_D28 |
| SMB53         | 89     | 100    | 89      | 0.419   | 0.081   | 0.14     |
| Bulleidia     | 89     | 67     | 44      | 0.004   | 0.002   | 0.002    |
| Akkermansia   | 22     | 11     | 33      | 0       | 0.001   | 0.001    |

| <b>Type 2</b> |        |        |         |         |         |          |
|---------------|--------|--------|---------|---------|---------|----------|
| <b>Genus</b>  | SB(N%) | D7(N%) | D28(N%) | mean_SB | mean_D7 | mean_D28 |
| SMB53         | 91     | 91     | 82      | 0.044   | 0.028   | 0.038    |
| Bulleidia     | 55     | 27     | 55      | 0.001   | 0.001   | 0.002    |
| Akkermansia   | 73     | 55     | 45      | 0.588   | 0.242   | 0.843    |
