# Supplementary material for: Gut microbiome changes in overweight male adults following bowel preparation
Source: BMC Genomics. 2018 Dec 31;19(Suppl 10):904. doi: 10.1186/s12864-018-5285-6 (PMC6311932; doi:10.1186/s12864-018-5285-6)
Supplement: Supplementary file 1 — Table S1. Exclusion criteria. (PDF 76 kb) [file 12864_2018_5285_MOESM1_ESM.pdf]

**Table S1.** Exclusion criteria

---

|                                                                                 |
|---------------------------------------------------------------------------------|
| I. Medication within one month prior to informed consent                        |
| 1. Antibiotic                                                                   |
| 2. Probiotic, prebiotic, symbiotic, or any food and drink containing probiotics |
| 3. Anti-inflammatory drugs                                                      |
| 4. Weight-loss medication                                                       |
| 5. Systemic steroid                                                             |
| 6. Medication for endocrine disorder                                            |
| 7. Alcohol or drug abuse                                                        |

---

|                                                                                |
|--------------------------------------------------------------------------------|
| II. Medical history of                                                         |
| 1. Myocardial infarction or stroke within 3 months prior to informed consent.  |
| 2. Liver disease                                                               |
| 3. Chronic kidney disease with stage higher than 3B                            |
| 4. Inflammatory gastrointestinal disorders such as Crohn's disease or colitis. |
| 5. Cancer                                                                      |
| 6. Gastrointestinal tract surgeries                                            |

---

|                                                                            |
|----------------------------------------------------------------------------|
| III. Take an investigational drug within 30 days prior to informed consent |
|----------------------------------------------------------------------------|

---

|                                                                                                                    |
|--------------------------------------------------------------------------------------------------------------------|
| IV. Any other clinical condition that would jeopardize subjects' safety while participating in this clinical trial |
|--------------------------------------------------------------------------------------------------------------------|

---
